# Supplementary material
Source: PubMed Central journal article supplement (PMC5412808)

**Fig 2A**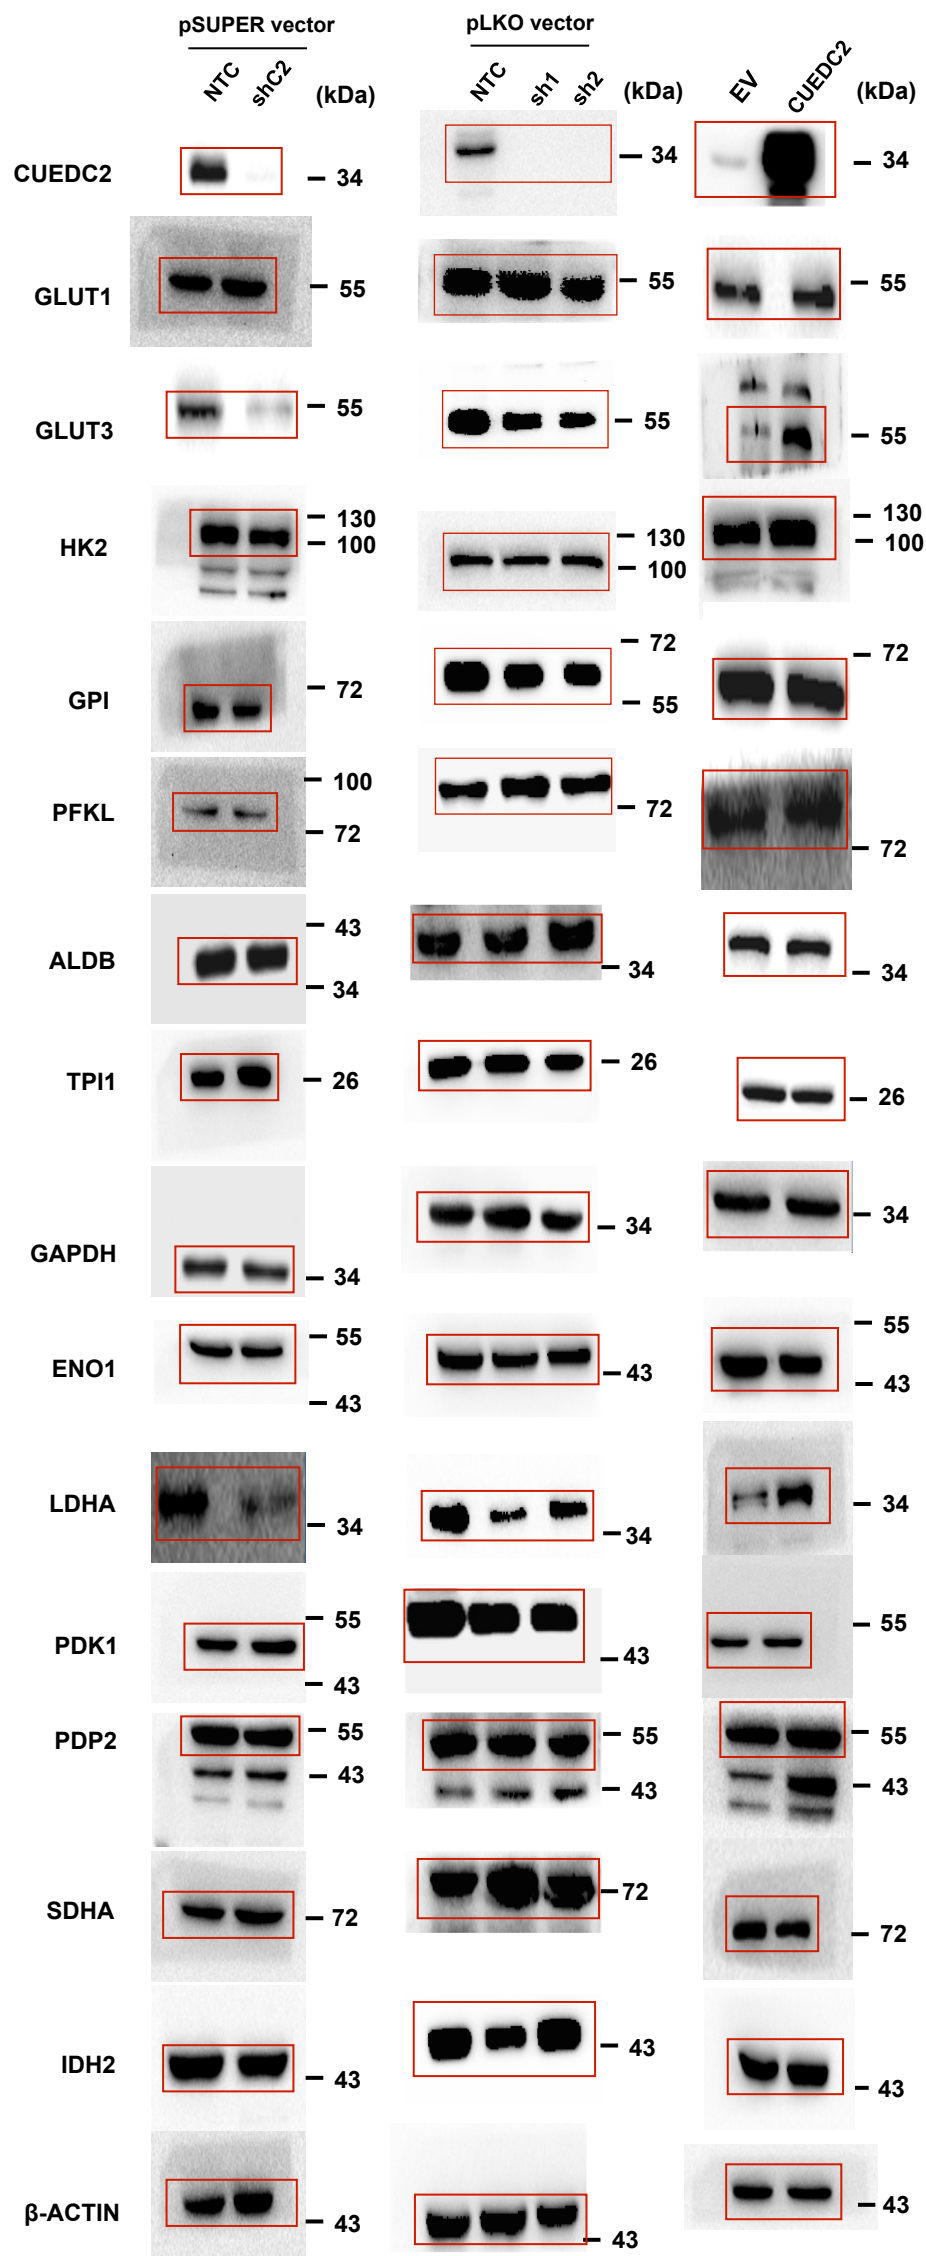

### Fig 2C Left

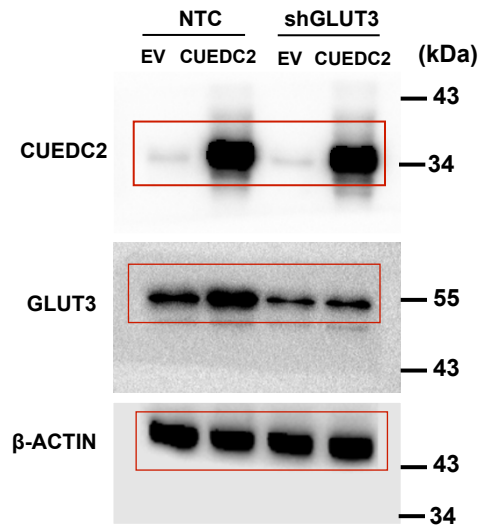

### Fig 2C Right

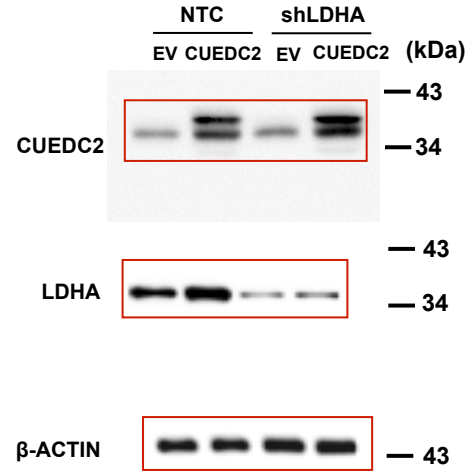

### Fig 2H Left

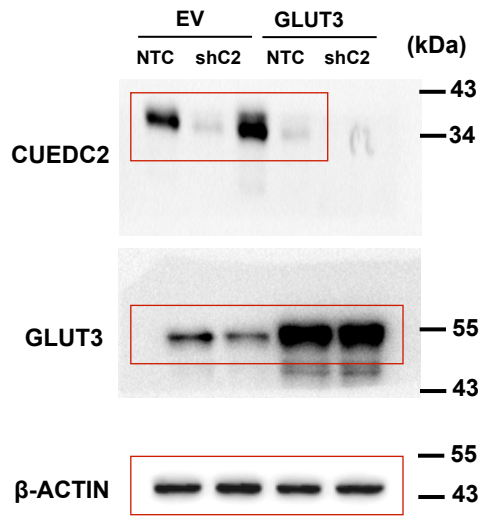

### Fig 2H Right

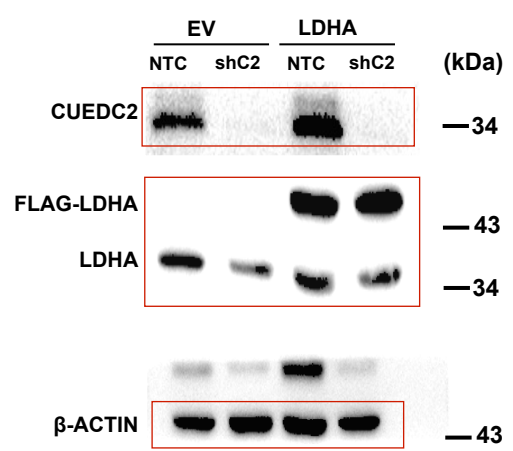

Supplement: EMBR-18-809-s004.pdf [file EMBR-18-809-s004.pdf]

**Fig 3A Left**

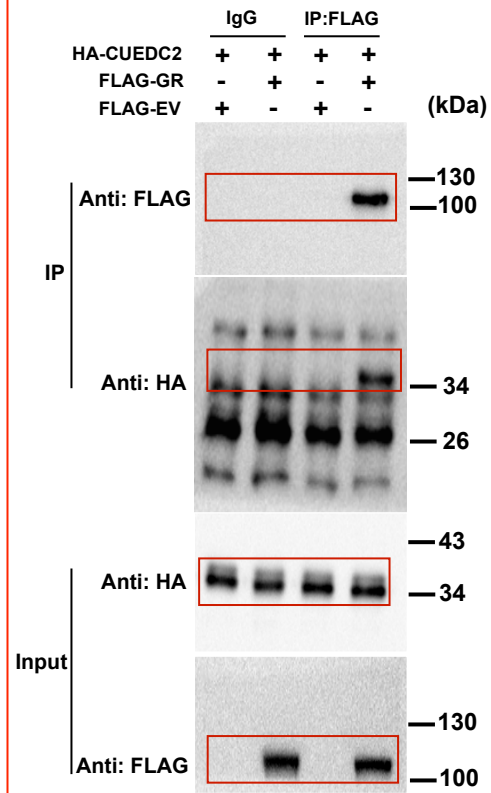

**Fig 3A Right**

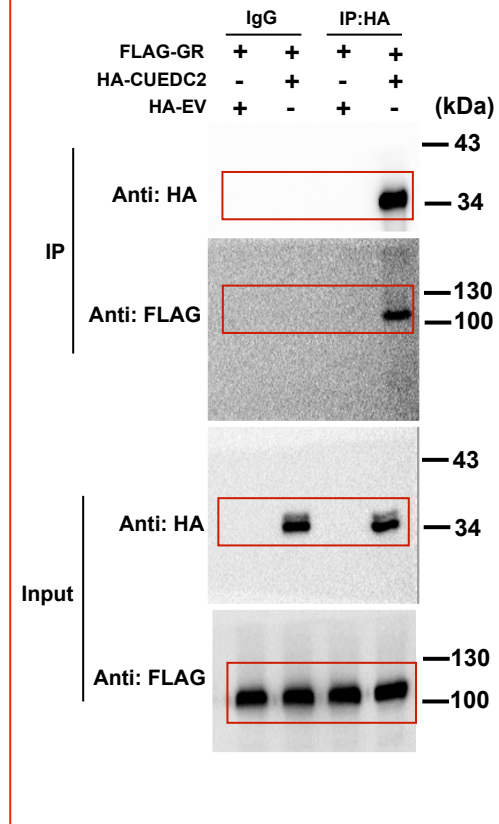

**Fig 3B**

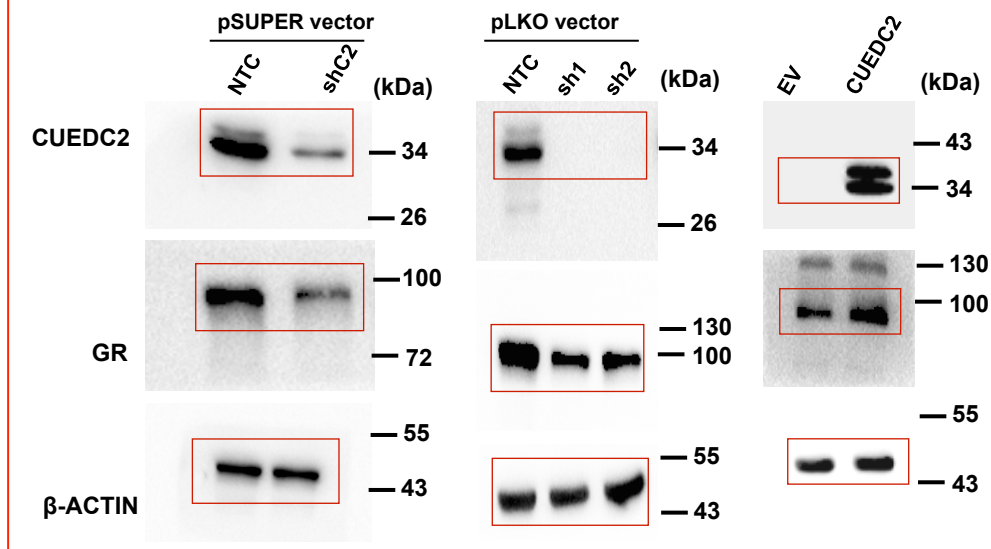

**Fig 3C**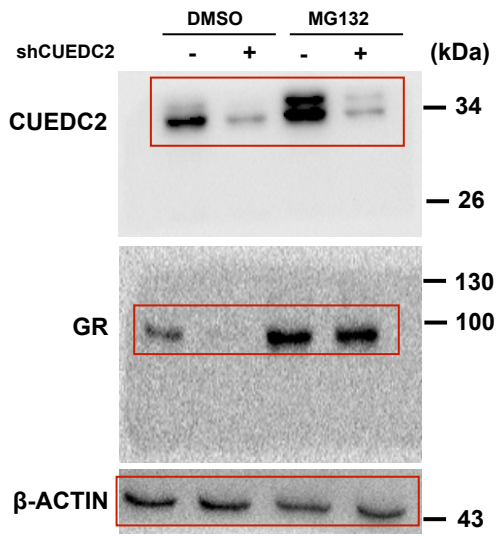**Fig 3D**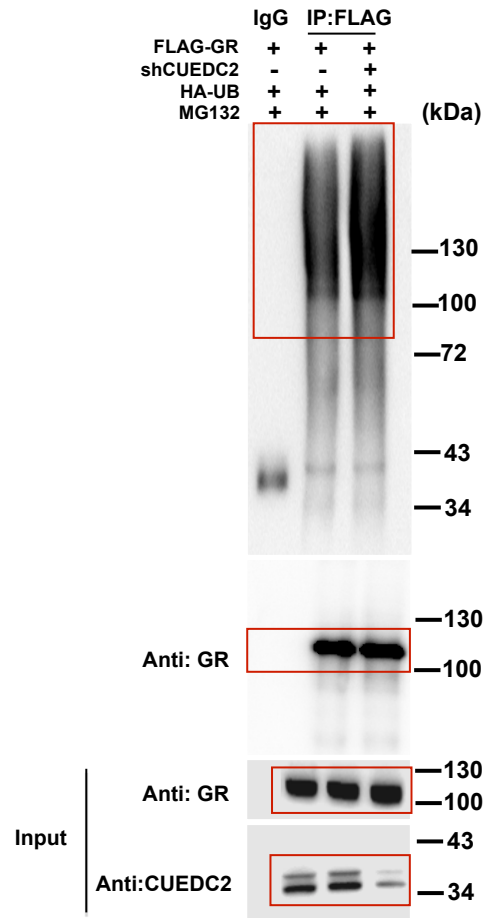**Fig 3F**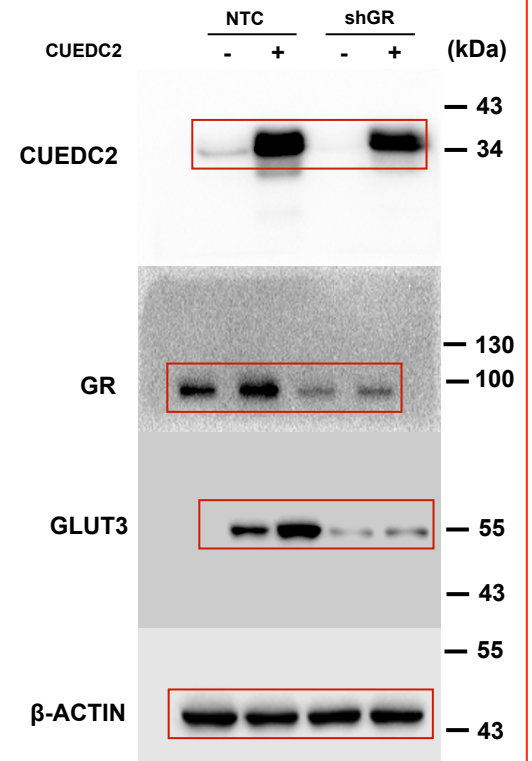

Supplement: EMBR-18-809-s005.pdf [file EMBR-18-809-s005.pdf]

**Fig 4A**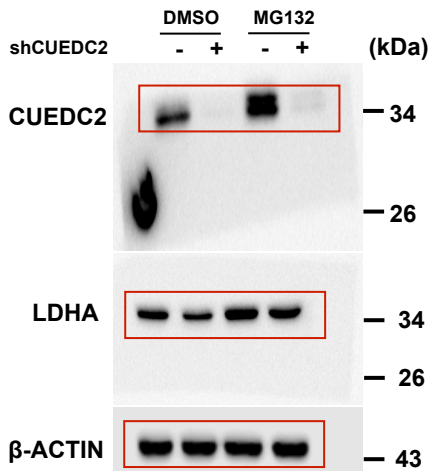**Fig 4B**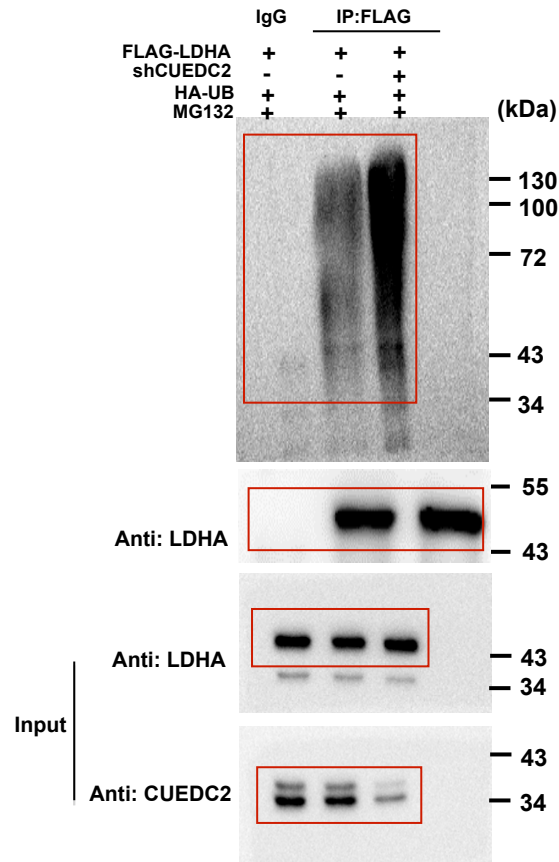**Fig 4C**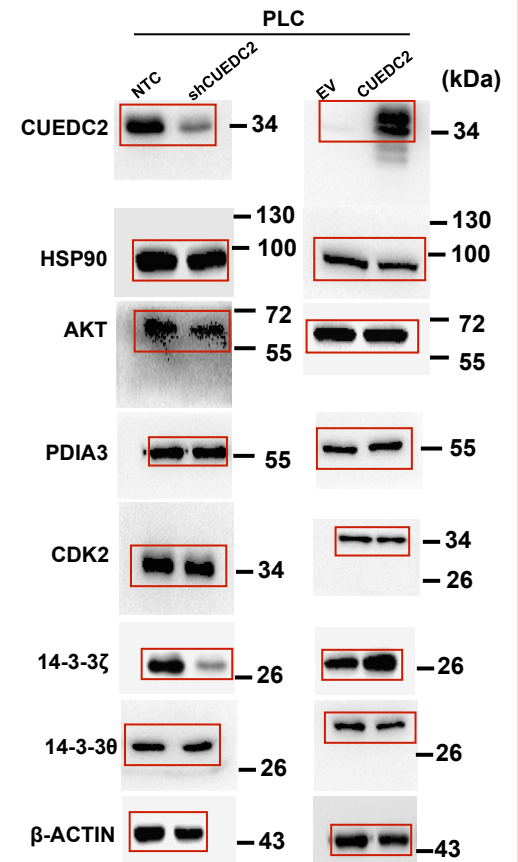**Fig 4D Left**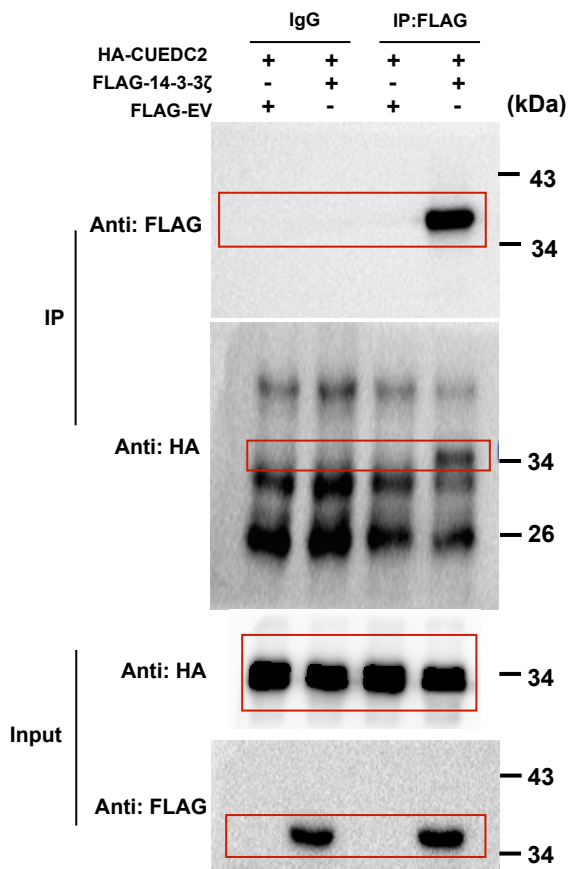**Fig 4D Right**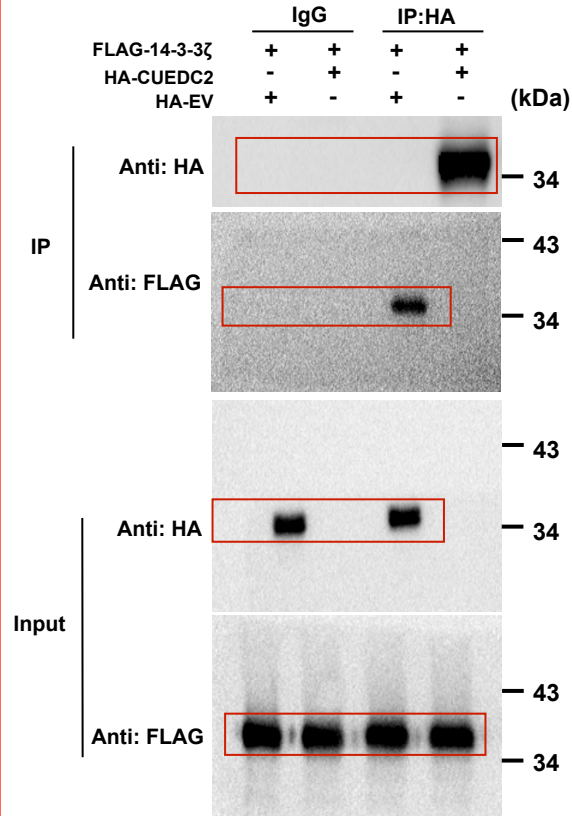**Fig 4E**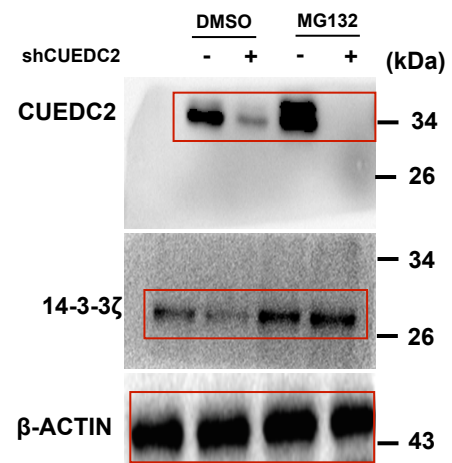

**Fig 4F**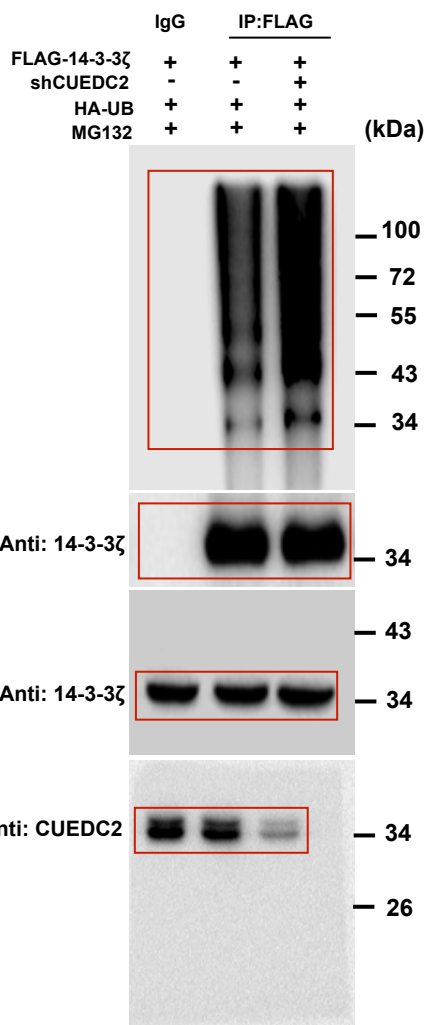**Fig 4G Left**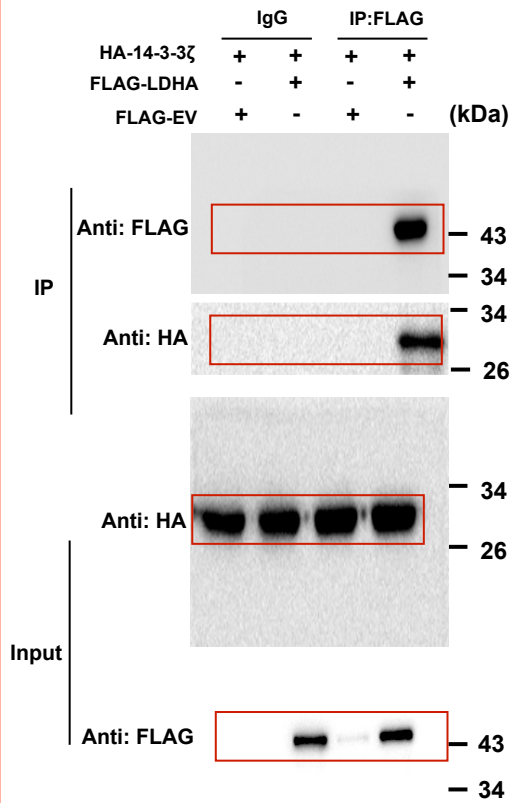**Fig 4G Right**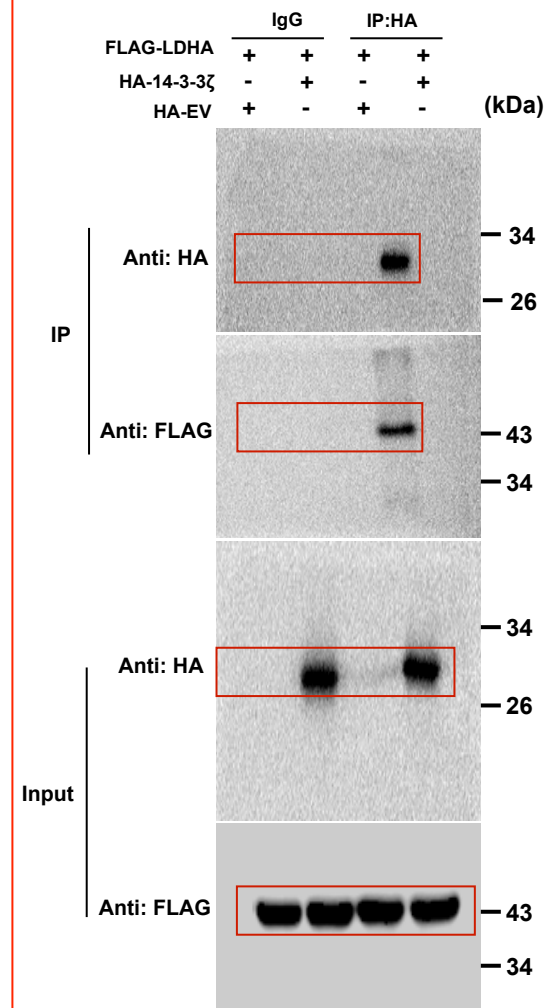**Fig 4H**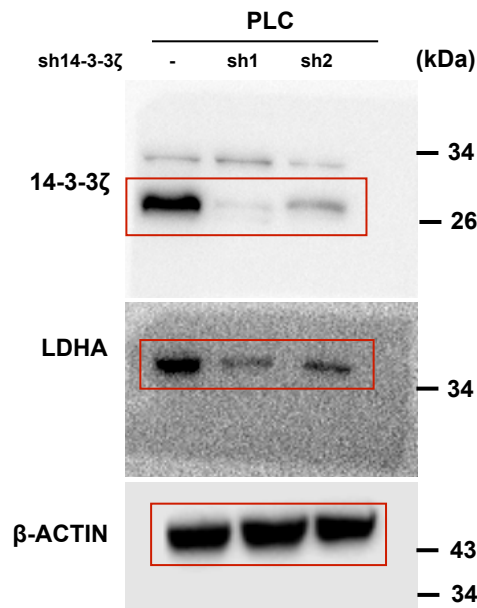**Fig 4I**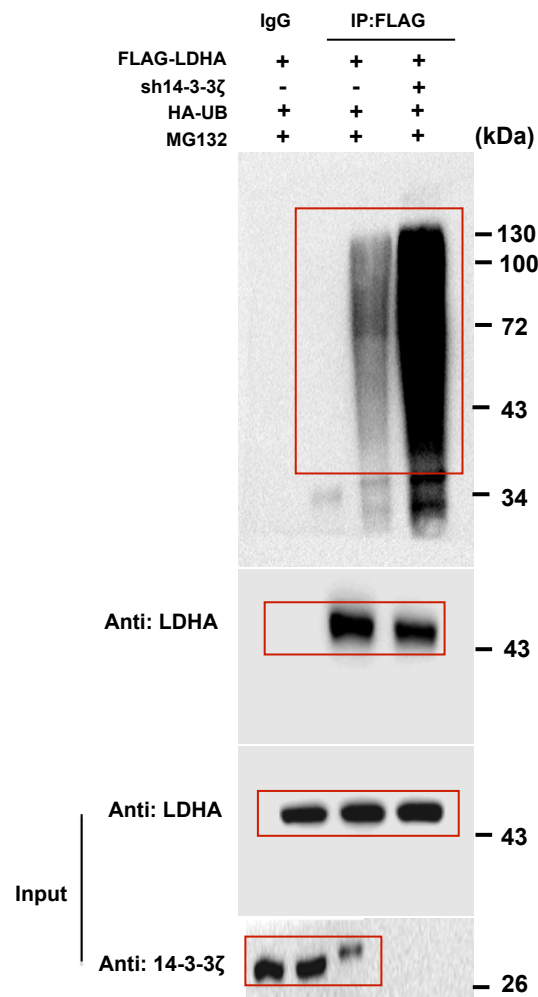**Fig 4J**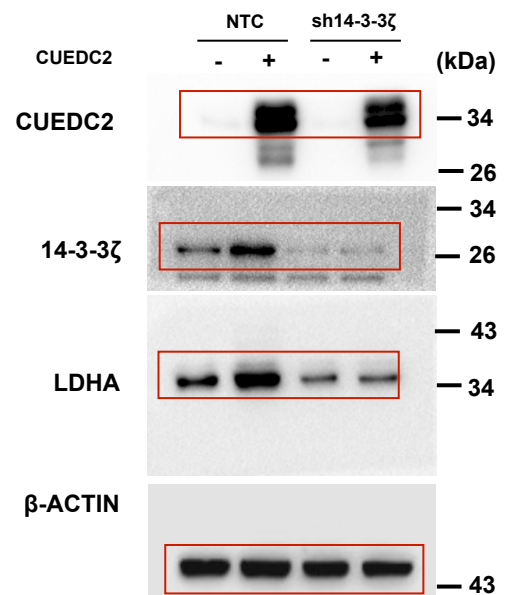

Supplement: EMBR-18-809-s006.pdf [file EMBR-18-809-s006.pdf]

Fig 6C

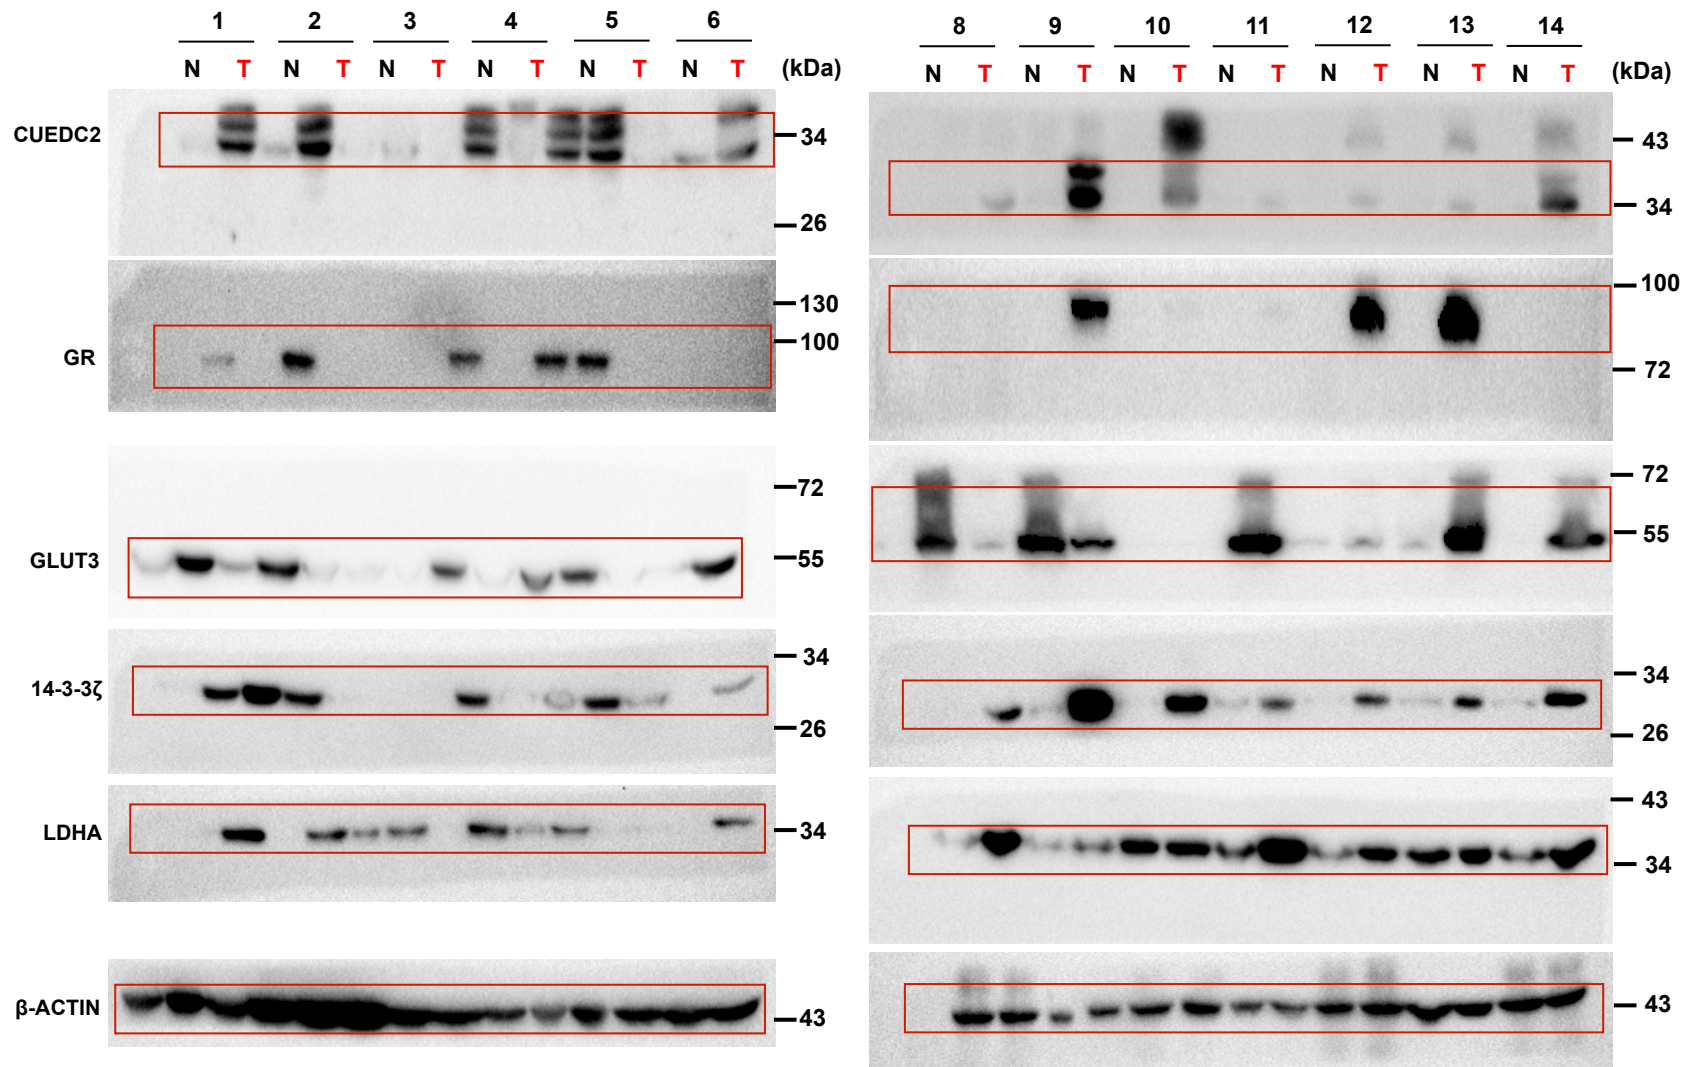

Supplement: EMBR-18-809-s008.pdf [file EMBR-18-809-s008.pdf]
